# Supplementary material
Source: HighWire-hosted journal article supplement (https://openheart.bmj.com/content/3/1/e000356)
Supplement: inline-supplementary-material-1 [file inline-supplementary-material-1.pdf]

## Supplementary File

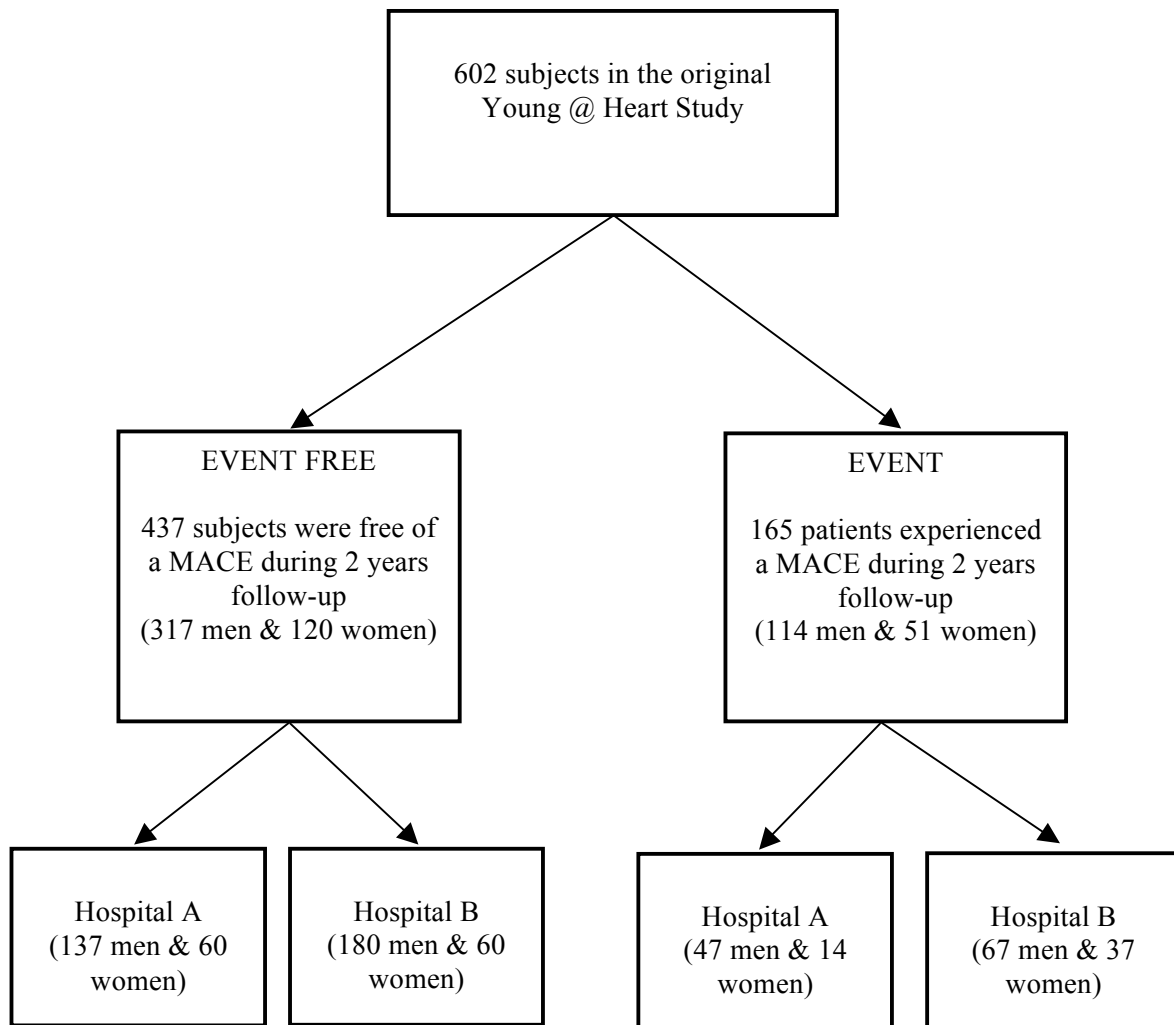

**Figure A** Flow chart of study subjects who had an event and were event free two years following the index event; MACE, major acute cardiovascular event
